# Supplementary material for: Reactivities of cyclam derivatives with metal–amyloid-β
Source: Royal Society of Chemistry journal article supplement (doi:10.1039/d0qi00791a), 2020-01-01
Supplement: d0qi00791a1.pdf [file d0qi00791a1.pdf]

**Supporting Information**  
**for**  
**Reactivities of Cyclam Derivatives with Metal–Amyloid- $\beta$**

Gunhee Kim,<sup>‡a</sup> Evan Lelong,<sup>‡b</sup> Juhye Kang,<sup>‡a,c</sup> Jong-Min Suh,<sup>a</sup> Nathalie Le Bris,<sup>b</sup>  
Hélène Bernard,<sup>b</sup> Dongwook Kim,<sup>a,d</sup> Raphaël Tripier<sup>\*b</sup> and Mi Hee Lim<sup>\*a</sup>

<sup>a</sup>Department of Chemistry, Korea Advanced Institute of Science and Technology (KAIST),  
Daejeon 34141, Republic of Korea

<sup>b</sup>Univ Brest, UMR CNRS 6521 CEMCA, 6 avenue Victor le Gorgeu, 29238 Brest, France

<sup>c</sup>Technical Support Center, Office of Research Affairs, Pohang University of Science and  
Technology, Pohang 37673, Republic of Korea

<sup>d</sup>Center for Catalytic Hydrocarbon Functionalizations, Institute for Basic Science (IBS), Daejeon  
34141, Republic of Korea

<sup>‡</sup>These authors contributed equally to this work.

\*To whom correspondence should be addressed: [miheelim@kaist.ac.kr](mailto:miheelim@kaist.ac.kr) and [raphael.tripier@univ-brest.fr](mailto:raphael.tripier@univ-brest.fr)

## Table of Contents

|                 |                                                                                                                                                                               |     |
|-----------------|-------------------------------------------------------------------------------------------------------------------------------------------------------------------------------|-----|
| <b>Table S1</b> | Summary of the X-ray crystallographic data for <b>1</b>                                                                                                                       | S3  |
| <b>Table S2</b> | Summary of the acidity constants ( $pK_{as}$ ) of <b>DMC, DMC-E, TMC, and TMC-E</b>                                                                                           | S4  |
| <b>Table S3</b> | Summary of the X-ray crystallographic data for [Cu( <b>DMC</b> )(Cl) <sub>2</sub> ]                                                                                           | S5  |
| <b>Table S4</b> | Summary of the X-ray crystallographic data for [Zn( <b>DMC</b> )(Cl) <sub>2</sub> ]                                                                                           | S6  |
| <b>Table S5</b> | Selected bond lengths (Å) and angles (°) for [Cu( <b>DMC</b> )(Cl) <sub>2</sub> ] and [Zn( <b>DMC</b> )(Cl) <sub>2</sub> ]                                                    | S7  |
| <b>Fig. S1</b>  | <sup>1</sup> H and <sup>13</sup> C NMR spectra of <b>1</b>                                                                                                                    | S8  |
| <b>Fig. S2</b>  | <sup>1</sup> H and <sup>13</sup> C NMR spectra of <b>2</b>                                                                                                                    | S9  |
| <b>Fig. S3</b>  | <sup>1</sup> H and <sup>13</sup> C NMR spectra of <b>DMC-E</b>                                                                                                                | S10 |
| <b>Fig. S4</b>  | <sup>1</sup> H and <sup>13</sup> C NMR spectra of <b>TMC-E</b>                                                                                                                | S11 |
| <b>Fig. S5</b>  | <sup>1</sup> H and <sup>13</sup> C NMR spectra of <b>4</b>                                                                                                                    | S12 |
| <b>Fig. S6</b>  | <sup>1</sup> H and <sup>13</sup> C NMR spectra of <b>CB-Cyclam-E</b>                                                                                                          | S13 |
| <b>Fig. S7</b>  | <sup>1</sup> H and <sup>13</sup> C NMR spectra of <b>5</b>                                                                                                                    | S14 |
| <b>Fig. S8</b>  | <sup>1</sup> H and <sup>13</sup> C NMR spectra of <b>CB-DMC-E</b>                                                                                                             | S15 |
| <b>Fig. S9</b>  | Superposition of the X-ray crystal structures of cyclam-hydroxyethyl-bisformyl <b>1</b> and cyclam-bisformyl                                                                  | S16 |
| <b>Fig. S10</b> | Solution speciation studies of <b>DMC, DMC-E, TMC, and TMC-E</b> by potentiometry                                                                                             | S17 |
| <b>Fig. S11</b> | Possible interactions of <b>Cyclam</b> and its derivatives with A $\beta$ <sub>42</sub> monomer visualized by docking studies                                                 | S18 |
| <b>Fig. S12</b> | Interactions of Cu(II)-treated A $\beta$ <sub>42</sub> with <b>Cyclam-E, DMC-E, TMC-E, CB-Cyclam-E, or CB-DMC-E</b> detected by ESI-MS                                        | S19 |
| <b>Fig. S13</b> | Original gel/Western blot data of Fig. 5                                                                                                                                      | S20 |
| <b>Fig. S14</b> | Morphologies of the resultant metal-free and metal-treated A $\beta$ <sub>42</sub> aggregates generated upon incubation with <b>TMC-E</b> and <b>CB-DMC-E</b> observed by TEM | S21 |
| <b>Fig. S15</b> | Ability of <b>Cyclam</b> and its derivatives to remove H <sub>2</sub> O <sub>2</sub>                                                                                          | S22 |
| <b>Fig. S16</b> | Cytotoxicity of <b>Cyclam</b> and its derivatives in the absence and presence of metal ions                                                                                   | S23 |

**Table S1** Summary of the X-ray crystallographic data for **1**.

|                                         |                                                                               |
|-----------------------------------------|-------------------------------------------------------------------------------|
| Empirical formula                       | $C_{14}H_{28}N_4O$                                                            |
| Formula weight                          | 268.4                                                                         |
| Temperature                             | 170 K                                                                         |
| Wavelength                              | 0.71073 Å                                                                     |
| Crystal system                          | Monoclinic                                                                    |
| Space group                             | P-1                                                                           |
|                                         | $a = 8.4724(6)\text{Å}$                                                       |
| Unit cell dimensions                    | $b = 8.8104(6)\text{Å}$ $\beta = 95.879(6)^\circ$<br>$c = 10.4428(7)\text{Å}$ |
| Volume                                  | $715.16(9)\text{Å}^3$                                                         |
| Z                                       | 2                                                                             |
| Density (calculated)                    | $1.246\text{ mg/m}^3$                                                         |
| Absorption coefficient                  | $0.081\text{ mm}^{-1}$                                                        |
| F(000)                                  | 296                                                                           |
| Crystal size                            | $0.37 \times 0.12 \times 0.05\text{ mm}^3$                                    |
| $\theta$ range for data collection      | $3.46$ to $26.37^\circ$                                                       |
| Index ranges                            | $-10 \leq h \leq 10$ , $-11 \leq k \leq 10$ , $-12 \leq l \leq 13$            |
| Reflections collected                   | 5561                                                                          |
| Independent reflections                 | 2904 [R(int) = 0.0256]                                                        |
| Completeness to $\theta = 25.242^\circ$ | 99.6%                                                                         |
| Absorption correction                   | Semi-empirical from equivalents                                               |
| Max. and min. transmission              | 0.9960 and 0.9707                                                             |
| Refinement method                       | Full-matrix least-squares on $F^2$                                            |
| Data/restraints/parameters              | 2904 / 0 / 173                                                                |
| Goodness-of-fit on $F^2$                | 0.883                                                                         |
| Final R indices [ $I > 2\sigma(I)$ ]    | R1 = 0.0428, wR2 = 0.0874                                                     |
| R indices (all data)                    | R1 = 0.0847, wR2 = 0.0974                                                     |
| Extinction coefficient                  | n/a                                                                           |
| Largest diff. peak and hole             | 0.243 and $-0.159\text{ e}\cdot\text{Å}^{-3}$                                 |

**Table S2** Summary of the acidity constants ( $pK_a$ s) of **DMC**, **DMC-E**, **TMC**, and **TMC-E**.

|                 | L=                                       | $pK_a^a$            |                       |          |          |         |         |
|-----------------|------------------------------------------|---------------------|-----------------------|----------|----------|---------|---------|
|                 |                                          | Cyclam <sup>b</sup> | Cyclam-E <sup>b</sup> | DMC      | DMC-E    | TMC     | TMC-E   |
| LH              | $\rightleftharpoons$ L + H               | 11.54               | 11.16(1)              | 10.61(2) | 10.88(2) | 9.45(3) | 9.69(2) |
| LH <sub>2</sub> | $\rightleftharpoons$ LH + H              | 10.35               | 10.14(2)              | 9.02(4)  | 8.89(4)  | 9.13(2) | 9.13(2) |
| LH <sub>3</sub> | $\rightleftharpoons$ LH <sub>2</sub> + H | 2.43                | -                     | -        | -        | 2.75(6) | 2.27(3) |
| LH <sub>4</sub> | $\rightleftharpoons$ LH <sub>3</sub> + H | 1.97                | -                     | -        | -        | 2.1(9)  | -       |

Charges are omitted for clarity. Conditions: [compound] = 2 mM; 25 °C;  $I = 0.10$  M in KNO<sub>3</sub>.

<sup>a</sup>Values in parentheses are standard derivations in the last significant digit. <sup>b</sup>The values are obtained from reference 1.

### Reference

1. N. Camus, Z. Halime, N. le Bris, H. Bernard, M. Beyler, C. Platas-Lglesias and R. Tripier, A [two-step/one week] synthesis of C-functionalized homocyclens and cyclams. Application to the preparation of conjugable BCAs without chelating properties alteration, *RSC Adv.*, 2015, **5**, 85898–85910.

**Table S3** Summary of the X-ray crystallographic data for [Cu(DMC)(Cl)<sub>2</sub>].

|                                   |                                                                  |
|-----------------------------------|------------------------------------------------------------------|
| Empirical formula                 | C <sub>12</sub> H <sub>28</sub> Cl <sub>2</sub> CuN <sub>4</sub> |
| Formula weight                    | 362.82                                                           |
| Temperature                       | 153(2) K                                                         |
| Wavelength                        | 0.71073 Å                                                        |
| Crystal system                    | Monoclinic                                                       |
| Space group                       | P2 <sub>1</sub> /n                                               |
|                                   | a = 6.813(2) Å                                                   |
| Unit cell dimensions              | b = 12.552(5) Å    β = 103.241(12)°                              |
|                                   | c = 10.796(4) Å                                                  |
| Volume                            | 898.6(6) Å <sup>3</sup>                                          |
| Z                                 | 2                                                                |
| Density (calculated)              | 1.341 mg/m <sup>3</sup>                                          |
| Absorption coefficient            | 1.507 mm <sup>-1</sup>                                           |
| F(000)                            | 382                                                              |
| Crystal size                      | 0.471 x 0.121 x 0.098 mm <sup>3</sup>                            |
| θ range for data collection       | 3.620 to 27.999°                                                 |
| Index ranges                      | -8<=h<=8, -16<=k<=16, -13<=l<=14                                 |
| Reflections collected             | 9934                                                             |
| Independent reflections           | 2133 [R(int) = 0.0586]                                           |
| Completeness to θ = 25.242°       | 98.8%                                                            |
| Absorption correction             | Semi-empirical from equivalent                                   |
| Max. and min. transmission        | 0.7457 and 0.5275                                                |
| Refinement method                 | Full-matrix least-squares on F <sup>2</sup>                      |
| Data/restraints/parameters        | 2133 / 0 / 92                                                    |
| Goodness-of-fit on F <sup>2</sup> | 1.038                                                            |
| Final R indices [I>2σ(I)]         | R1 = 0.0510, wR2 = 0.1163                                        |
| R indices (all data)              | R1 = 0.0672, wR2 = 0.1284                                        |
| Extinction coefficient            | n/a                                                              |
| Largest diff. peak and hole       | 0.855 and -0.514 e·Å <sup>-3</sup>                               |

**Table S4** Summary of the X-ray crystallographic data for [Zn(DMC)(Cl)<sub>2</sub>].

|                                   |                                                                          |
|-----------------------------------|--------------------------------------------------------------------------|
| Empirical formula                 | C <sub>12</sub> H <sub>28</sub> N <sub>4</sub> Cl <sub>2</sub> Zn        |
| Formula weight                    | 364.65                                                                   |
| Temperature                       | 100(2) K                                                                 |
| Wavelength                        | 0.700 Å                                                                  |
| Crystal system                    | Monoclinic                                                               |
| Space group                       | C2/c                                                                     |
| Unit cell dimensions              | a = 16.424(3) Å<br>b = 6.4810(13) Å    β = 112.23(3)°<br>c = 16.486(3) Å |
| Volume                            | 1624.4(6) Å <sup>3</sup>                                                 |
| Z                                 | 4                                                                        |
| Density (calculated)              | 1.491 mg/m <sup>3</sup>                                                  |
| Absorption coefficient            | 1.755 mm <sup>-1</sup>                                                   |
| F(000)                            | 768                                                                      |
| Crystal size                      | 0.034 x 0.032 x 0.012 mm <sup>3</sup>                                    |
| θ range for data collection       | 1.314 to 24.975°                                                         |
| Index ranges                      | -19 ≤ h ≤ 19, -7 ≤ k ≤ 7, -19 ≤ l ≤ 19                                   |
| Reflections collected             | 8024                                                                     |
| Independent reflections           | 2121 [R(int) = 0.0675]                                                   |
| Completeness to θ = 25.242°       | 97.1%                                                                    |
| Absorption correction             | Empirical                                                                |
| Max. and min. transmission        | 1.000 and 0.896                                                          |
| Refinement method                 | Full-matrix least-squares on F <sup>2</sup>                              |
| Data/restraints/parameters        | 2121 / 288 / 171                                                         |
| Goodness-of-fit on F <sup>2</sup> | 1.034                                                                    |
| Final R indices [I > 2σ(I)]       | R1 = 0.0825, wR2 = 0.2324                                                |
| R indices (all data)              | R1 = 0.1133, wR2 = 0.2644                                                |
| Largest diff. peak and hole       | 1.760 and -0.955 e·Å <sup>-3</sup>                                       |

**Table S5** Selected bond lengths (Å) and angles (°) for [Cu(**DMC**)(Cl)<sub>2</sub>] and [Zn(**DMC**)(Cl)<sub>2</sub>].

| [Cu( <b>DMC</b> )(Cl) <sub>2</sub> ] |           | [Zn( <b>DMC</b> )(Cl) <sub>2</sub> ] |           |
|--------------------------------------|-----------|--------------------------------------|-----------|
| Cu1–N1                               | 1.987(3)  | Zn1–N1                               | 2.268(19) |
| Cu1–N2                               | 2.066(3)  | Zn1–N2                               | 2.11(4)   |
| Cu1–N3                               | 1.987(3)  | Zn1–N3                               | 2.11(4)   |
| Cu1–N4                               | 2.066(3)  | Zn1–N4                               | 2.268(19) |
| Cu1–Cl1                              | 2.982(1)  | Zn1–Cl1                              | 2.461(6)  |
| Cu1–Cl2                              | 2.982(1)  | Zn1–Cl2                              | 2.461(6)  |
| N1–Cu1–N2                            | 93.50(12) | N1–Zn1–N2                            | 79.3(12)  |
| N2–Cu1–N3                            | 86.50(12) | N2–Zn1–N3                            | 84.8(18)  |
| N3–Cu1–N4                            | 93.50(12) | N3–Zn1–N4                            | 87.3(12)  |
| N4–Cu1–N1                            | 86.50(12) | N4–Zn1–N1                            | 161.9(8)  |
| N1–N2–N3–N4 <sup>a</sup>             | 0         | N1–N2–N3–N4 <sup>a</sup>             | 80.59     |

<sup>a</sup>This angle was obtained by averaging the dihedral angles obtained from the two measurements.

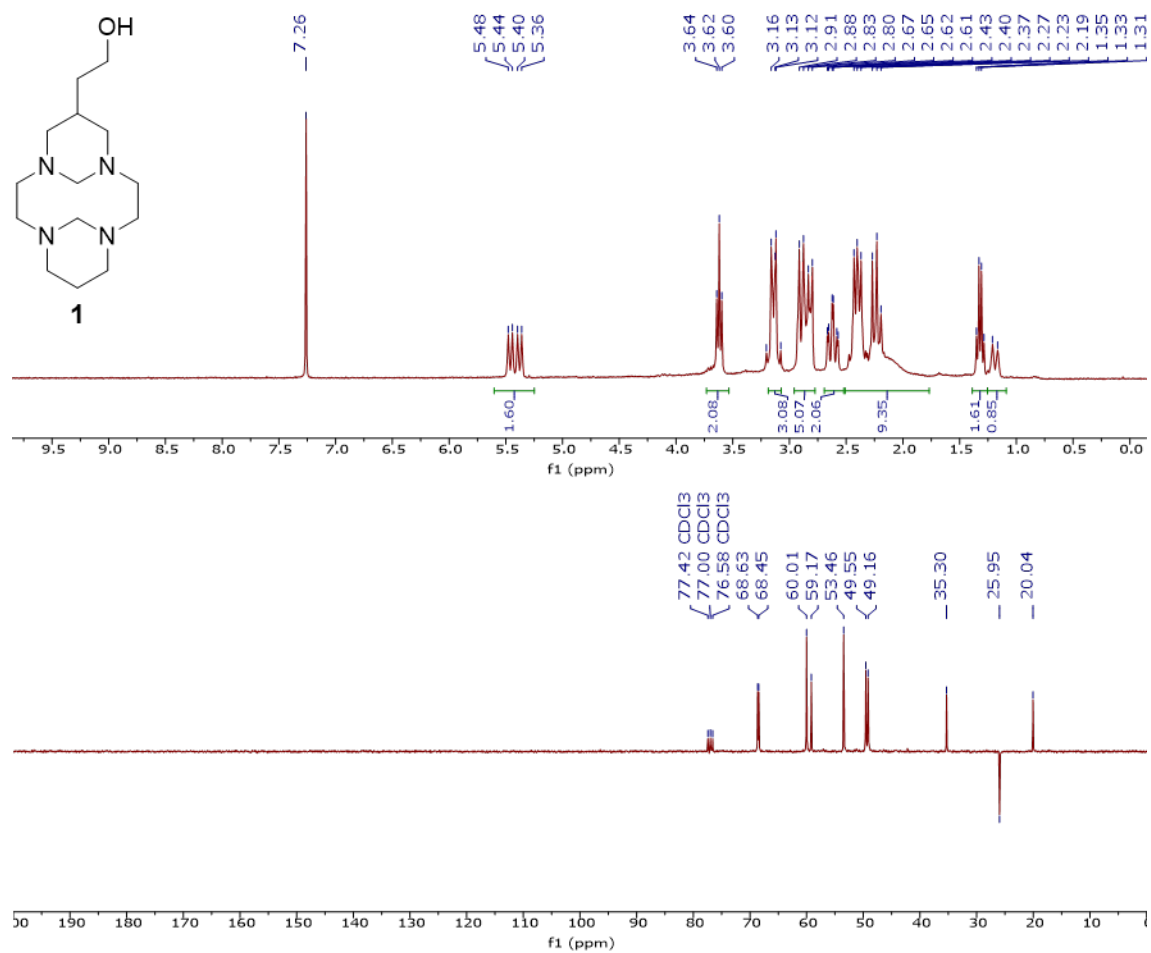

**Fig. S1** NMR [<sup>1</sup>H (300 MHz) and <sup>13</sup>C (75 MHz)] spectra of **1**.



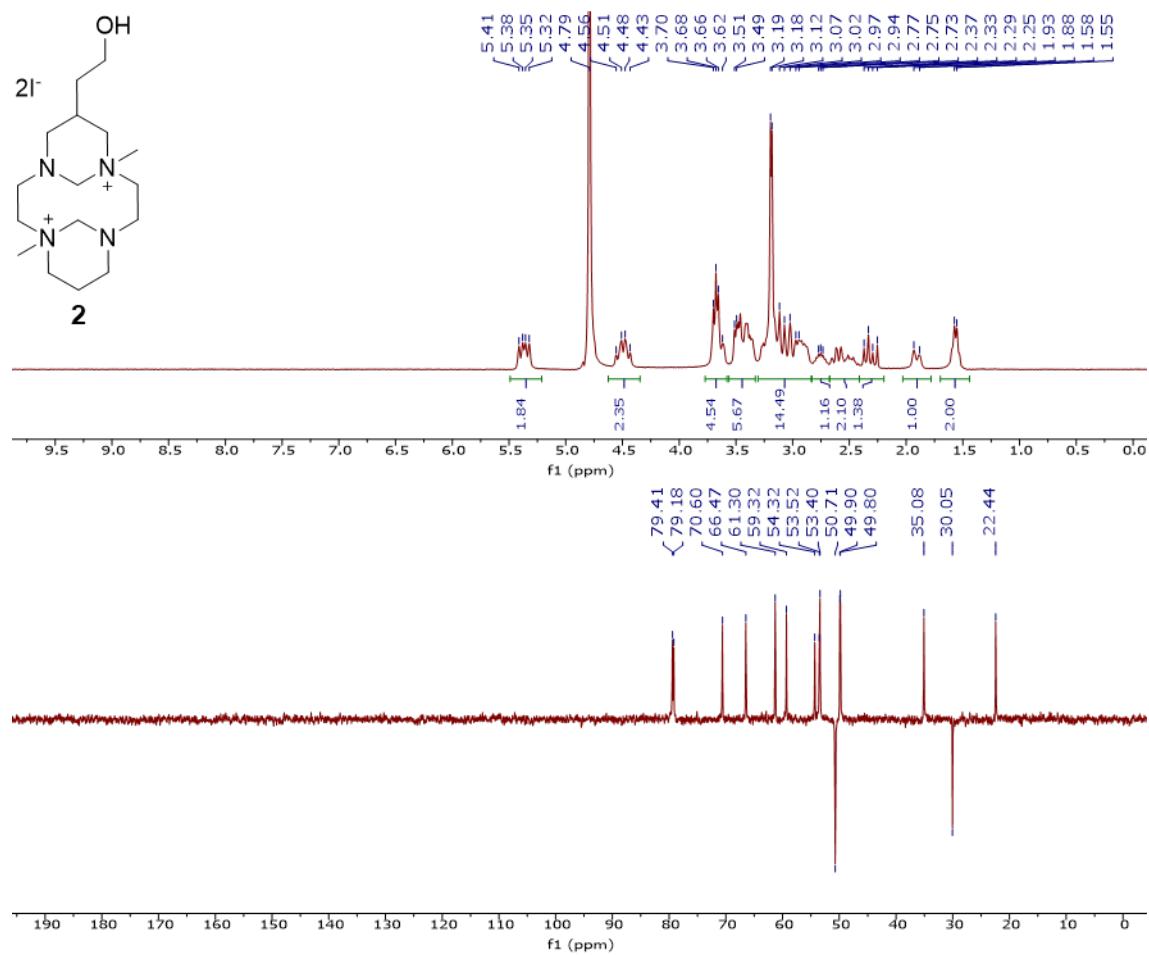

**Fig. S2** NMR [<sup>1</sup>H (300 MHz) and <sup>13</sup>C (75 MHz)] spectra of **2**.

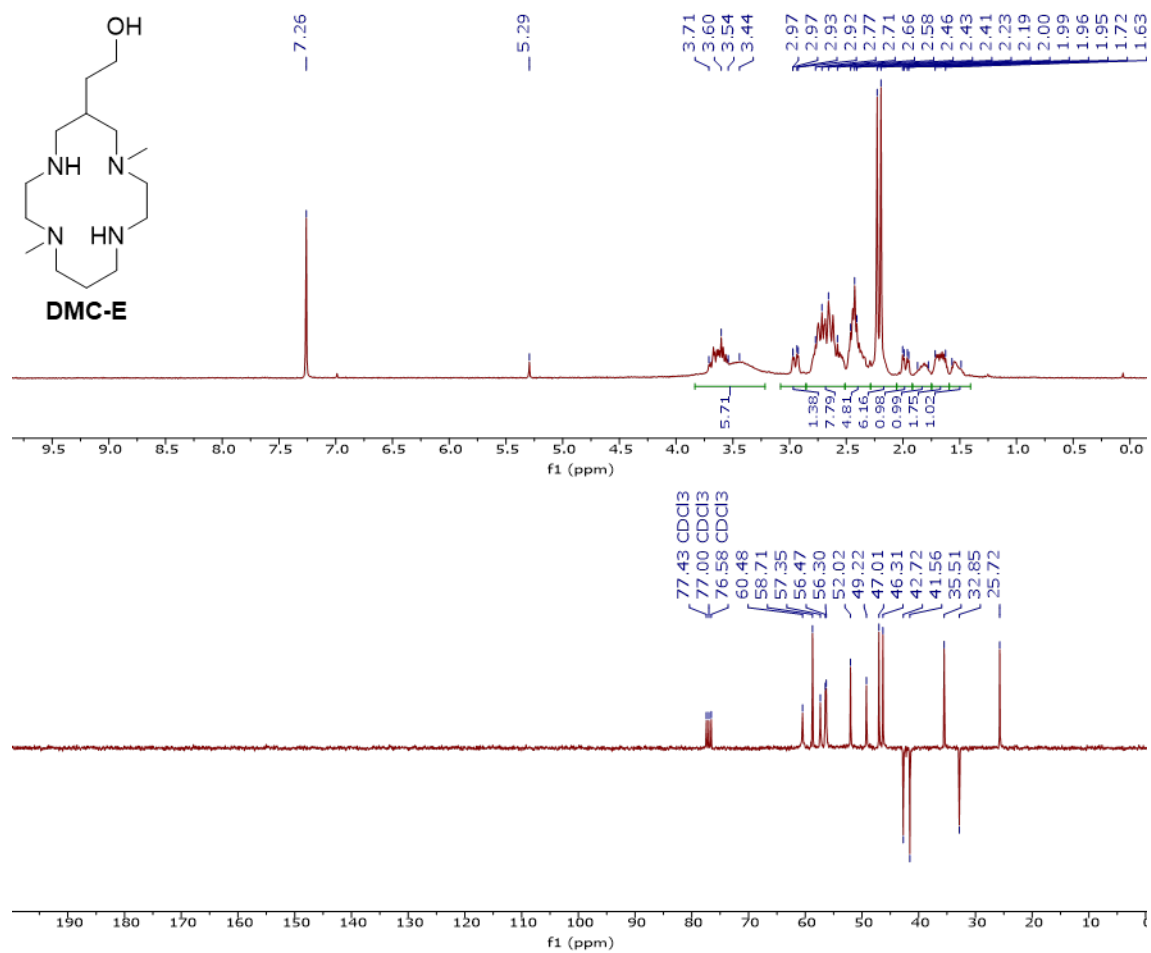

**Fig. S3** NMR [<sup>1</sup>H (300 MHz) and <sup>13</sup>C (75 MHz)] spectra of **DMC-E**.

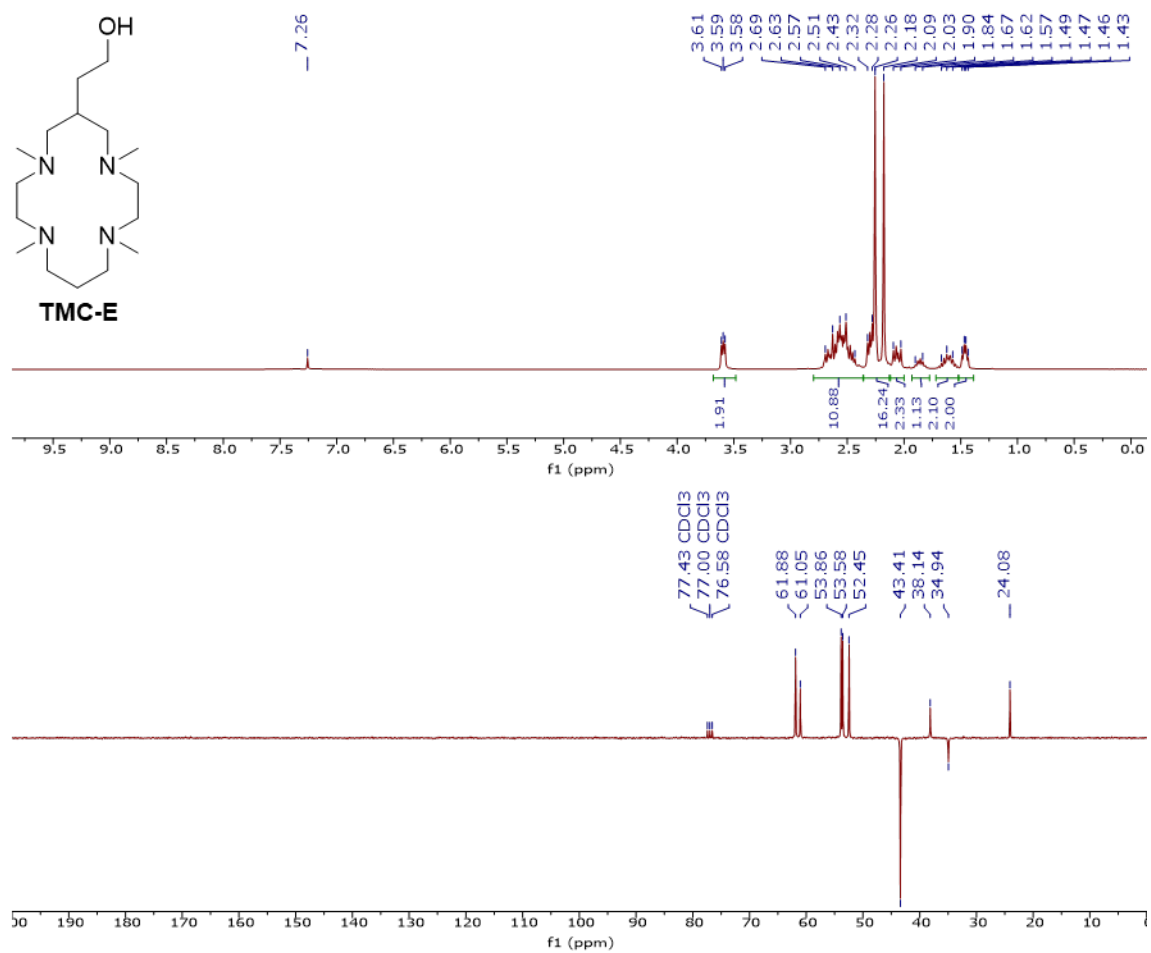

**Fig. S4** NMR [<sup>1</sup>H (300 MHz) and <sup>13</sup>C (75 MHz)] spectra of **TMC-E**.

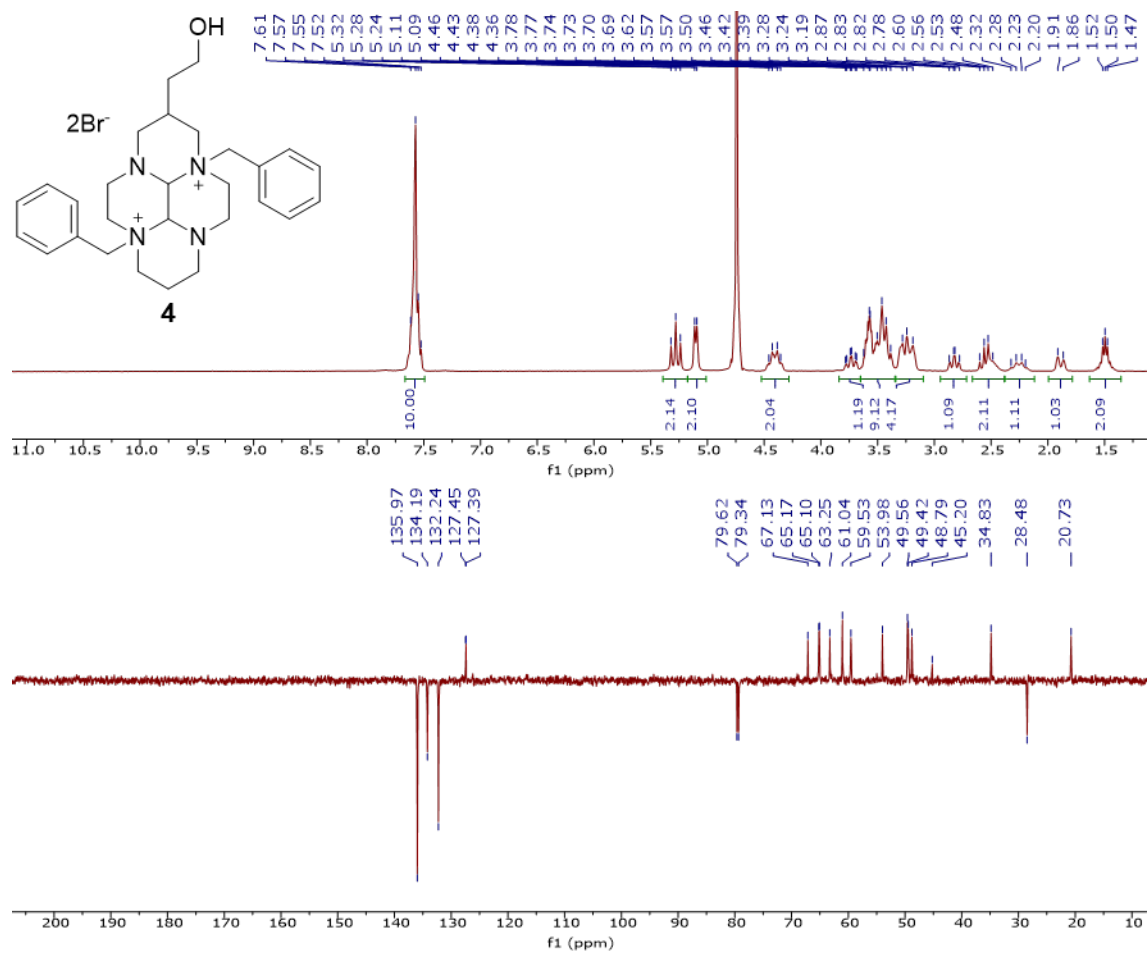

**Fig. S5** NMR [<sup>1</sup>H (300 MHz) and <sup>13</sup>C (75 MHz)] spectra of **4**.

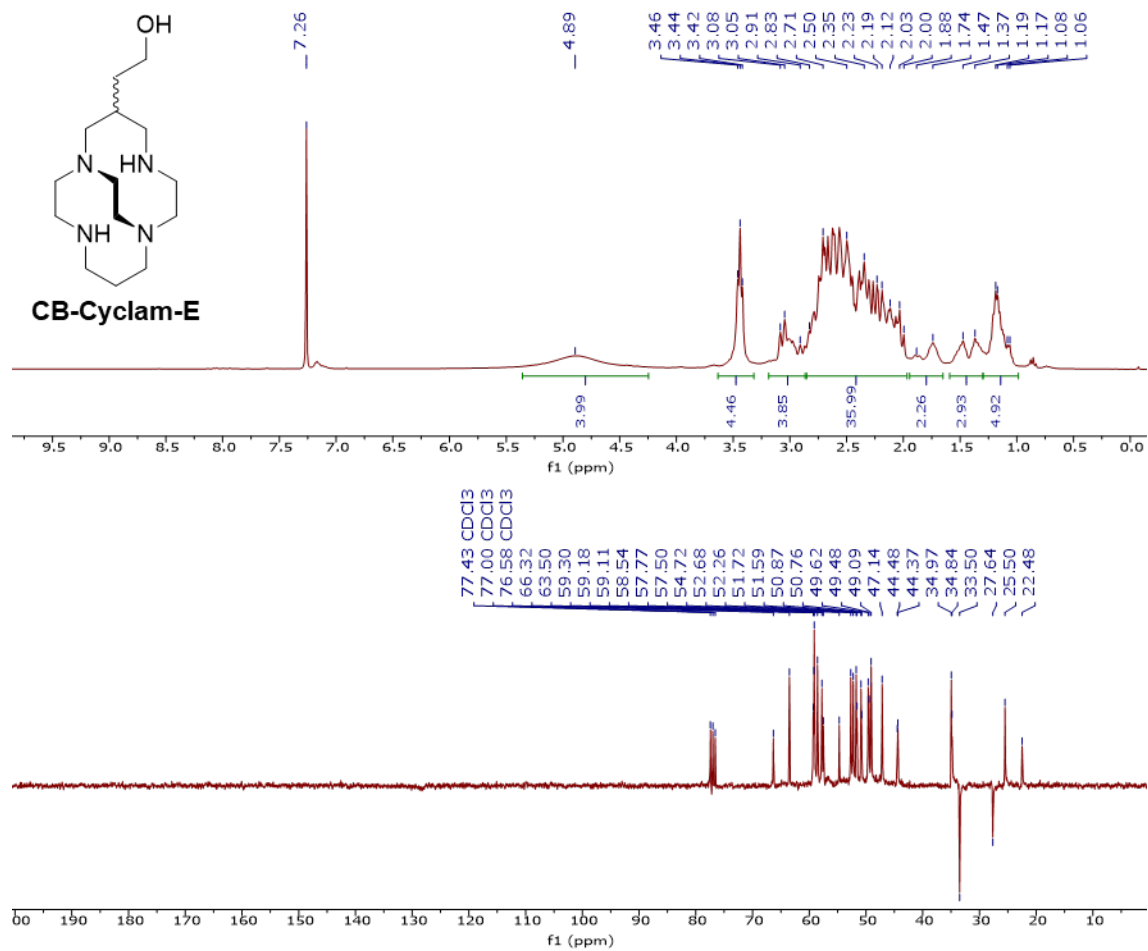

**Fig. S6** NMR [ $^1\text{H}$  (300 MHz) and  $^{13}\text{C}$  (75 MHz)] spectra of **CB-Cyclam-E**.

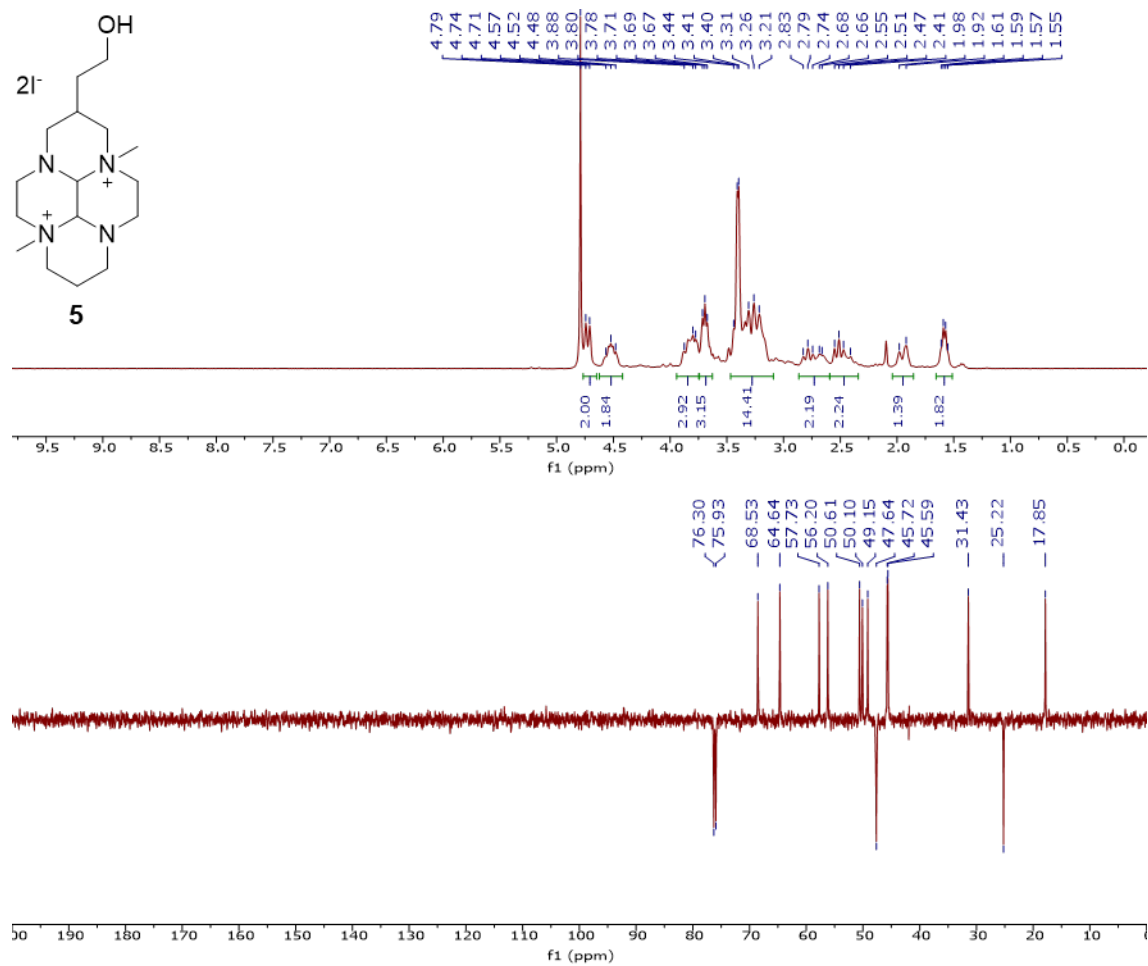

**Fig. S7** NMR [<sup>1</sup>H (300 MHz) and <sup>13</sup>C (75 MHz)] spectra of **5**.

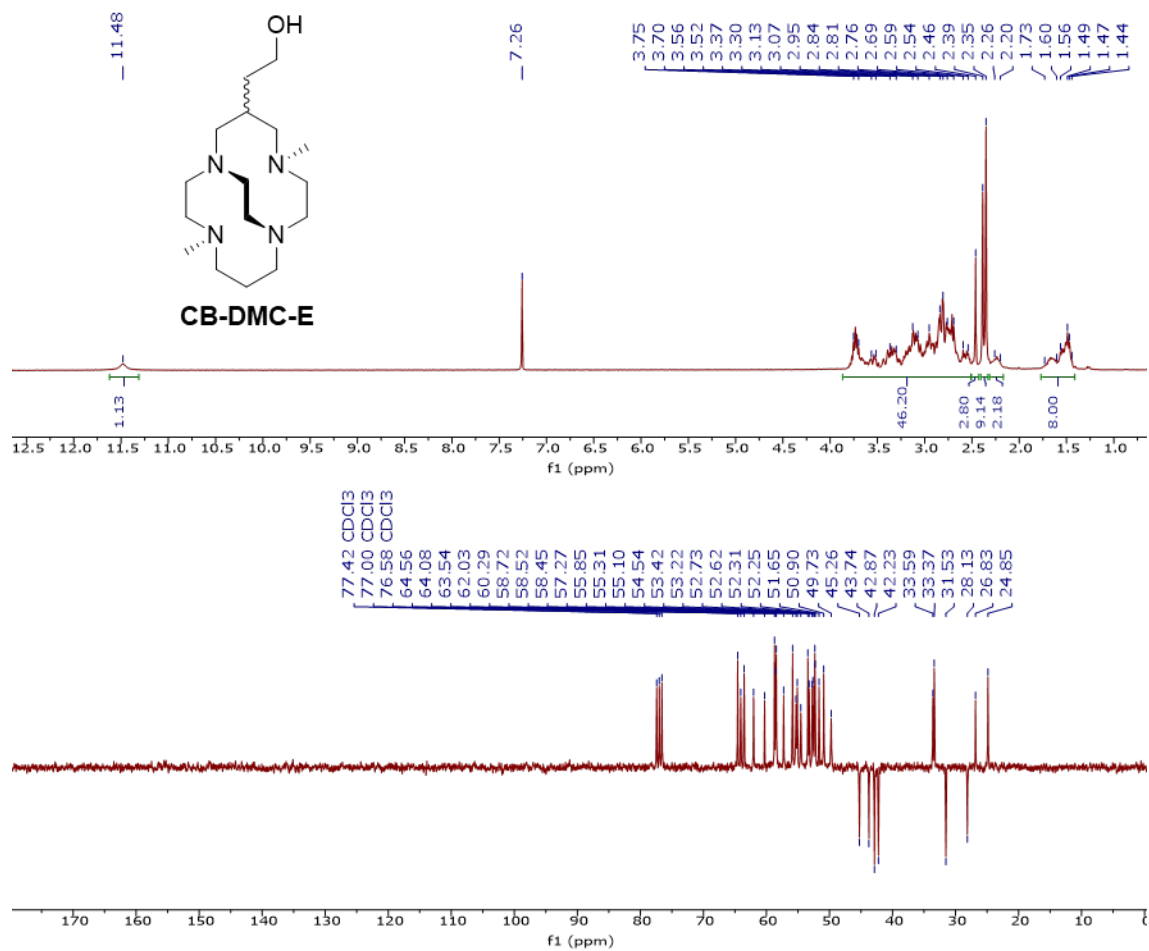

**Fig. S8** NMR [<sup>1</sup>H (300 MHz) and <sup>13</sup>C (75 MHz)] spectra of **CB-DMC-E**.

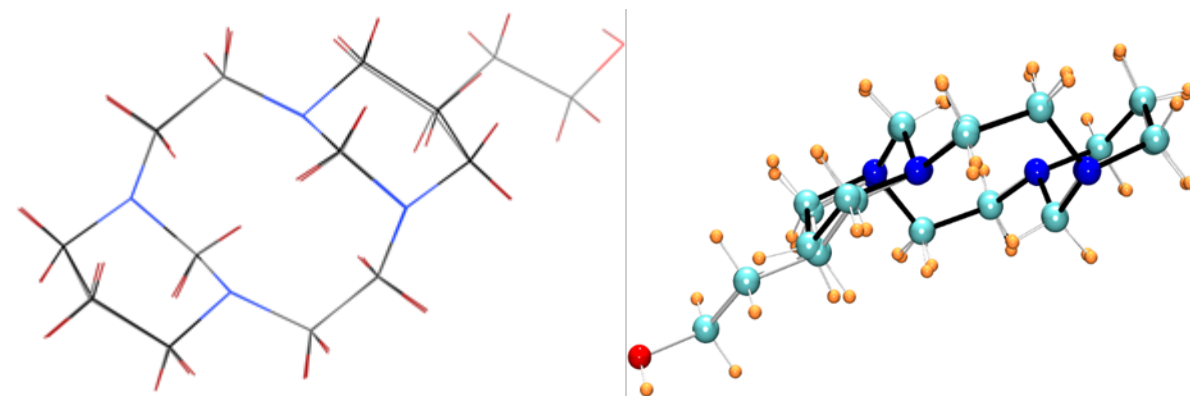

**Fig. S9** Superposition of the X-ray crystal structures of cyclam-hydroxyethyl-bisformyl **1** (grey bonds) and cyclam-bisformyl (black bonds).<sup>2</sup> The X-ray crystallographic data were summarized in Table S1.

#### Reference

2. G. Royal, V. Dahaoui-Gindrey, S. Dahaoui, A. Tabard, R. Guilard, P. Pullumbi and C. Lecomte, New synthesis of *trans*-disubstituted cyclam macrocycles – elucidation of the disubstitution mechanism on the basis of X-ray data and molecular modeling, *Eur. J. Org. Chem.*, 1998, 1971–1975.



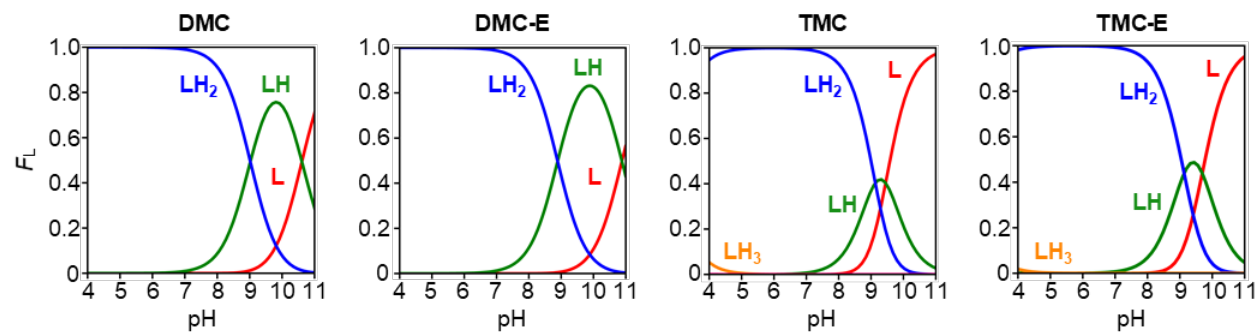

**Fig. S10** Solution speciation studies of **DMC**, **DMC-E**, **TMC**, and **TMC-E** by potentiometry. Solution speciation diagrams of the compounds ( $F_L$  = fraction of species at given pH) were summarized. Charges are omitted for clarity. Conditions: [compound] = 2 mM; 25 °C;  $I$  = 0.10 M in  $KNO_3$ .

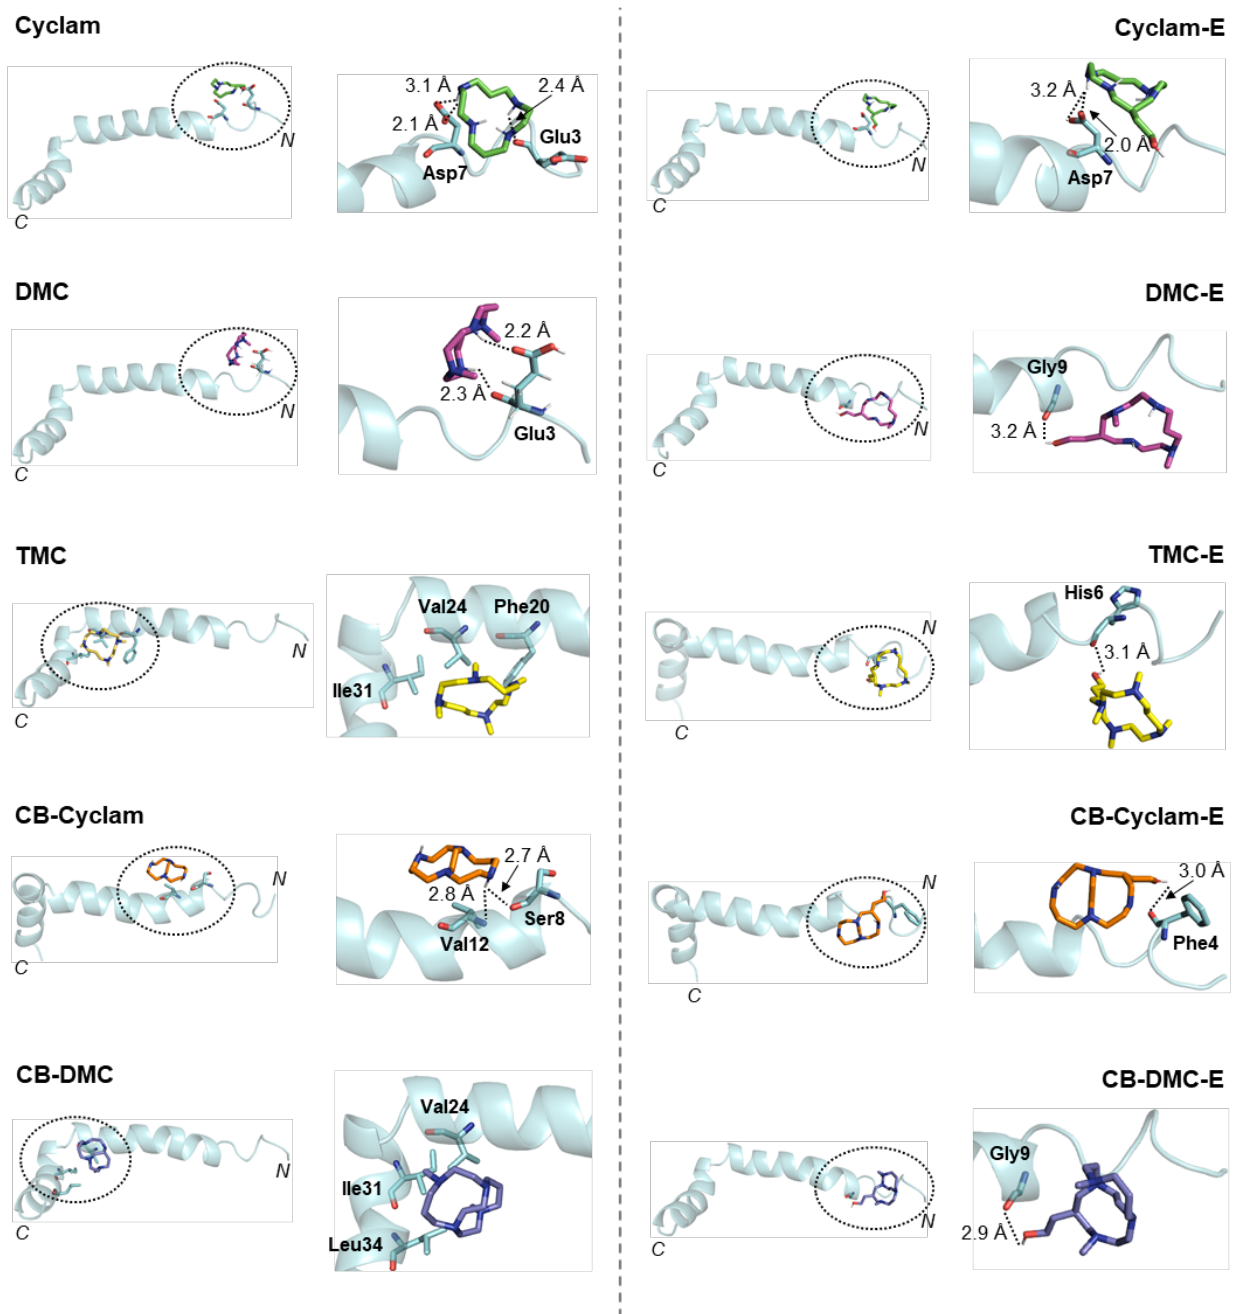

**Fig. S11** Possible interactions of **Cyclam** and its derivatives with the  $A\beta_{42}$  monomer (PDB 1IYT) visualized by docking studies. The structure of compounds and amino acid residues in  $A\beta_{42}$  adjacent to the compounds are indicated in stick representation. Distances of hydrogen bonding (within 3.2 Å) are labeled in Å with dashed lines.

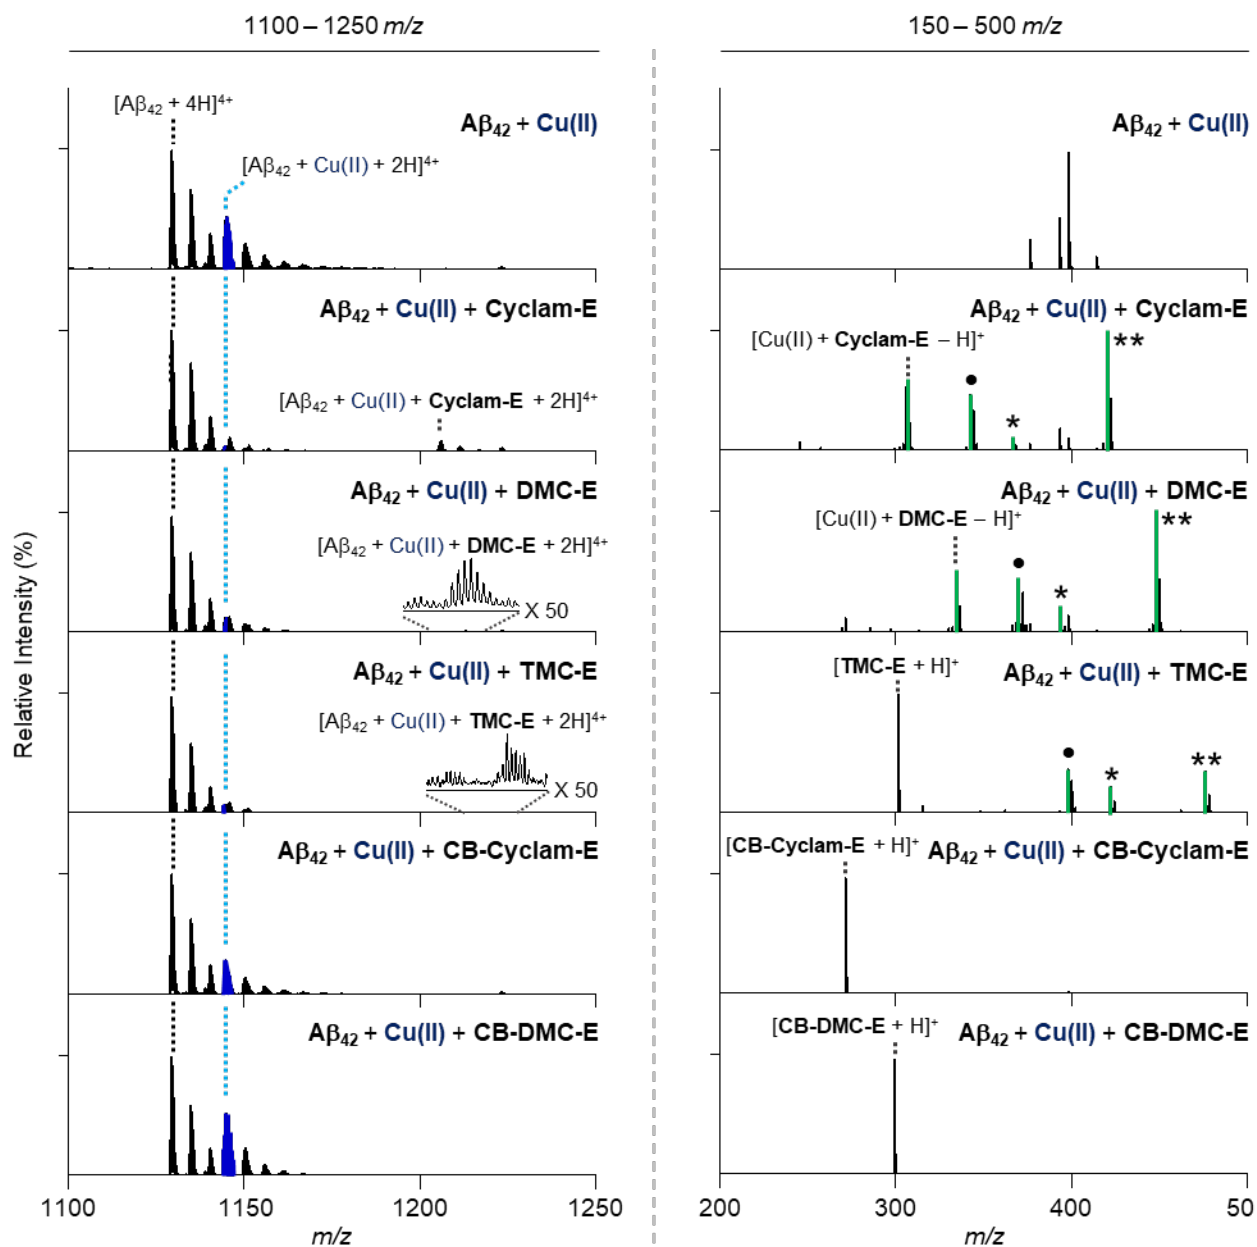

**Fig. S12** Interactions of Cu(II)-treated  $A\beta_{42}$  with **Cyclam-E**, **DMC-E**, **TMC-E**, **CB-Cyclam-E**, or **CB-DMC-E** detected by ESI-MS. Blue dashed line indicates the peak corresponding to  $[A\beta_{42} + Cu(II) + 2H]^{4+}$ . Green peaks denote the adducts of cyclam derivatives with Cu(II) ( $\bullet = [Cu(II) + compound + Cl]^+$ ;  $*$  =  $[Cu(II) + compound + CH_3COO]^+$ ;  $** = [Cu(II) + compound + CF_3COO]^+$ ). Conditions:  $[A\beta_{42}] = 25 \mu M$ ;  $[CuCl_2] = 25 \mu M$ ;  $[compound] = 25 \mu M$ ; 20 mM ammonium acetate, pH 7.3; 37 °C; 3 h incubation. The relative intensity of each spectrum was normalized based on the highest peak in the spectrum. Note that the trifluoroacetate moiety was originated from  $A\beta_{42}$ .

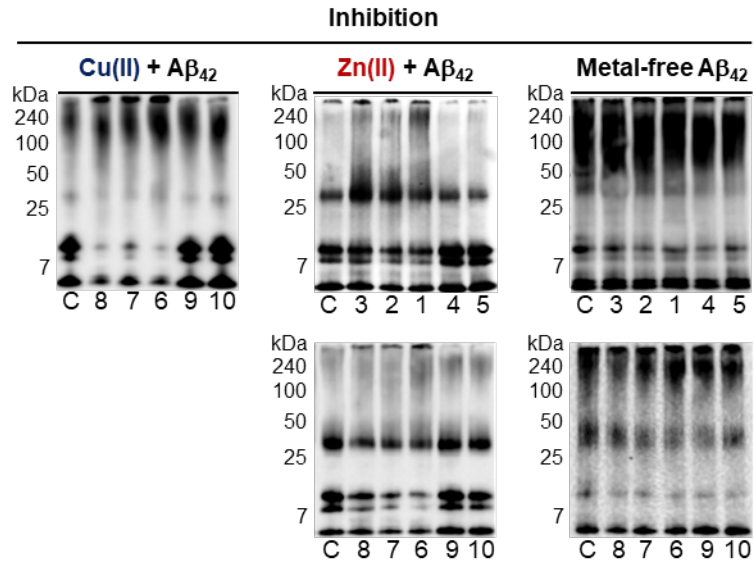

**Fig. S13** Original gel/Western blot data of Fig. 5. Detailed conditions are described in Fig. 5.

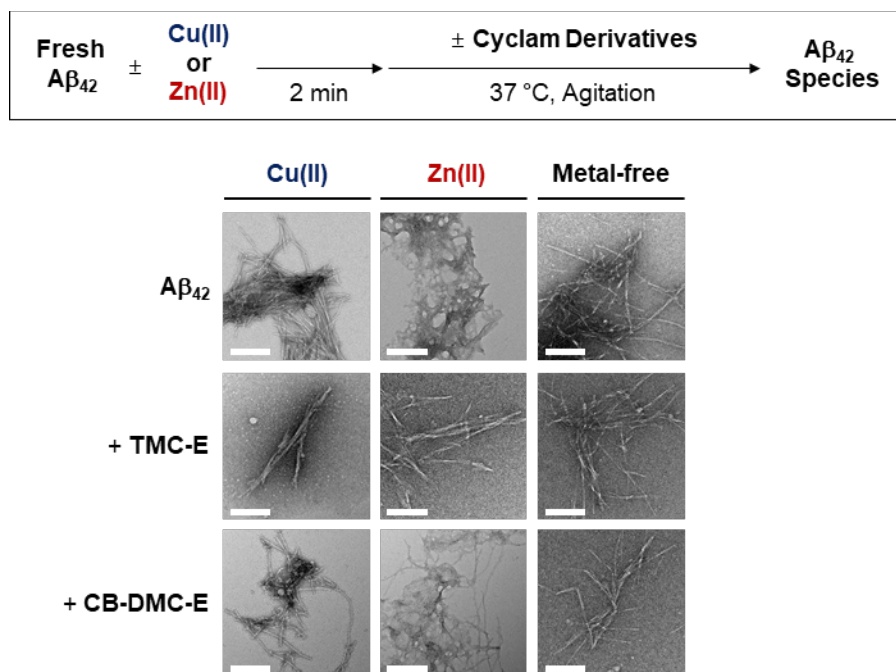

**Fig. S14** Morphologies of the resultant metal-free and metal-treated  $A\beta_{42}$  aggregates generated upon incubation with **TMC-E** and **CB-DMC-E** observed by TEM. Conditions:  $[A\beta_{42}] = 25 \mu\text{M}$ ;  $[\text{CuCl}_2 \text{ or } \text{ZnCl}_2] = 25 \mu\text{M}$ ;  $[\text{compound}] = 25 \mu\text{M}$ ; pH 7.4. Scale bar = 200 nm.

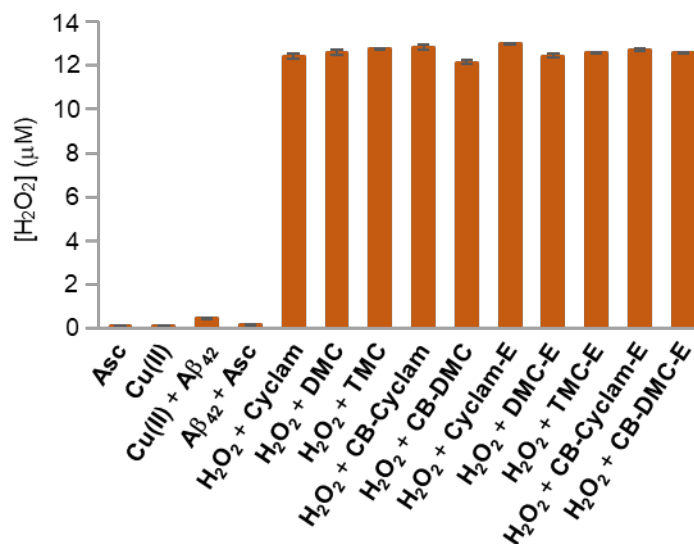

**Fig. S15** Ability of **Cyclam** and its derivatives to remove H<sub>2</sub>O<sub>2</sub>. The concentration of H<sub>2</sub>O<sub>2</sub> presented from the samples [*L*-ascorbate (Asc) only; Cu(II) only; Cu(II) + Aβ<sub>42</sub>; Aβ<sub>42</sub> + Asc; H<sub>2</sub>O<sub>2</sub> + compound] was detected by an Amplex Red H<sub>2</sub>O<sub>2</sub>/peroxidase assay. Conditions: [Aβ<sub>42</sub>] = 12.5 μM; [CuCl<sub>2</sub>] = 12.5 μM; [Asc] = 500 μM; [H<sub>2</sub>O<sub>2</sub>] = 12.5 μM; [compound] = 12.5 μM; 37 °C; 1 h incubation. Error bars represent the standard error of the mean from two independent experiments.

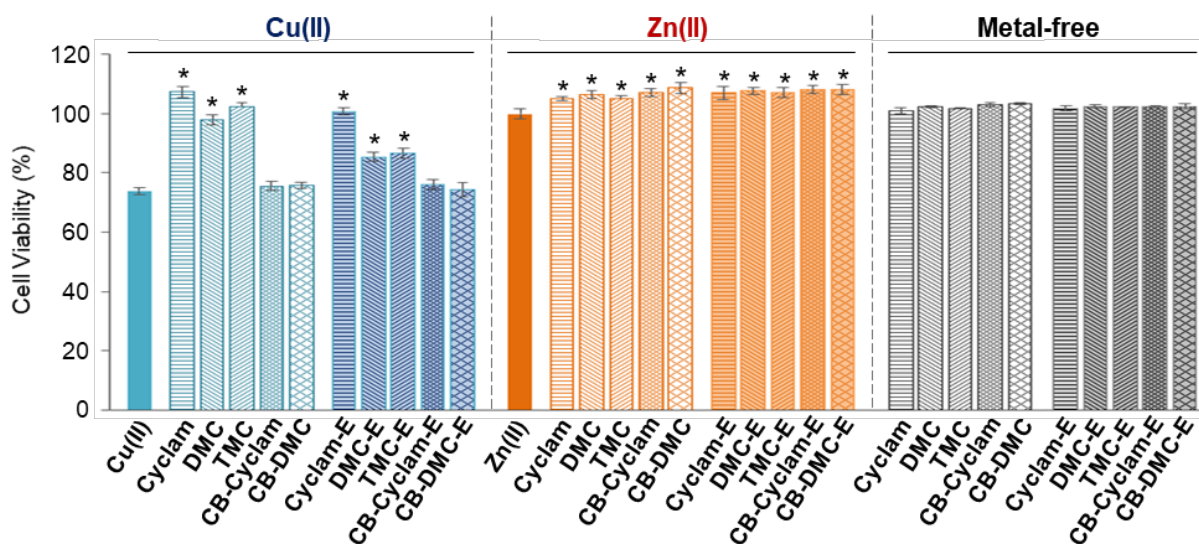

**Fig. S16** Cytotoxicity of **Cyclam** and its derivatives in the absence and presence of metal ions. Cell viability, determined by the MTT assay, was calculated in comparison to that obtained upon treatment with an equivalent amount of H<sub>2</sub>O. Conditions: [CuCl<sub>2</sub> or ZnCl<sub>2</sub>] = 50 μM; [compound] = 50 μM; 37 °C; 24 h incubation. Error bars represent the standard error of the mean from three independent experiments. \**P* < 0.05.
